# Supplementary material
Source: HighWire-hosted journal article supplement (http://www.cmaj.ca/highwire/filestream/59191/field_highwire_adjunct_files/0/screen-wong-1-at.pdf)

## Appendix 1 (as supplied by the authors): Detailed Markov model of chronic hepatitis C virus infection and progression

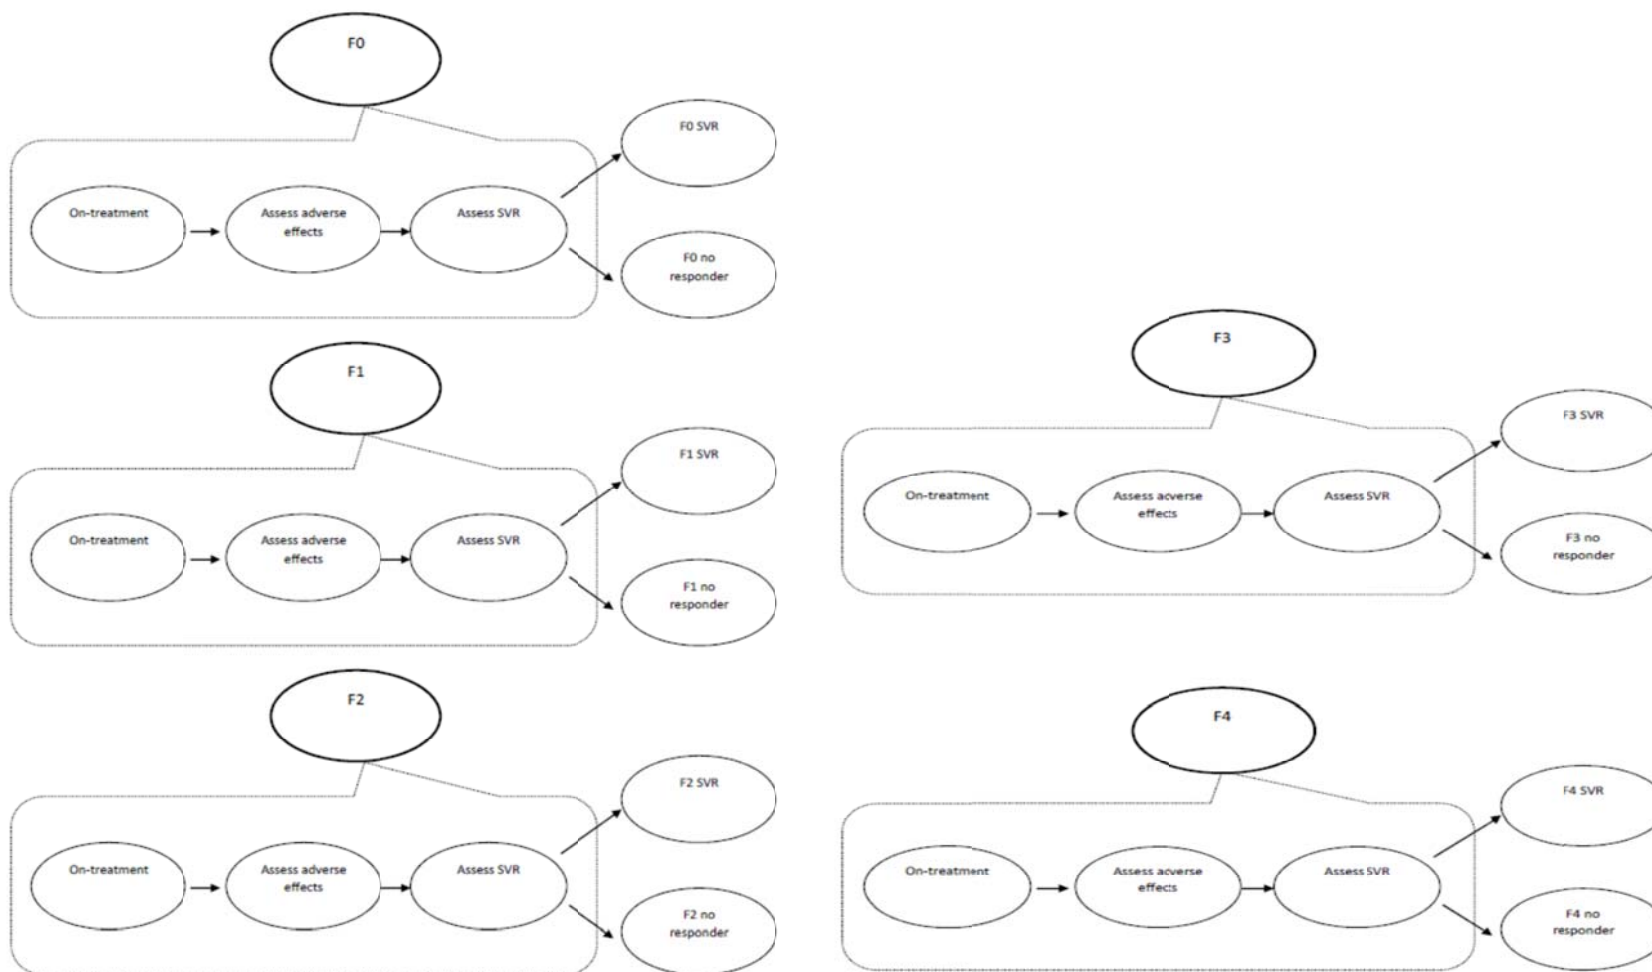

Appendix to: Wong WWL, Tu HA, Feld JJ, et al. Cost-effectiveness of screening for hepatitis C in Canada. *CMAJ* 2015.  
DOI:10.1503/cmaj.140711.

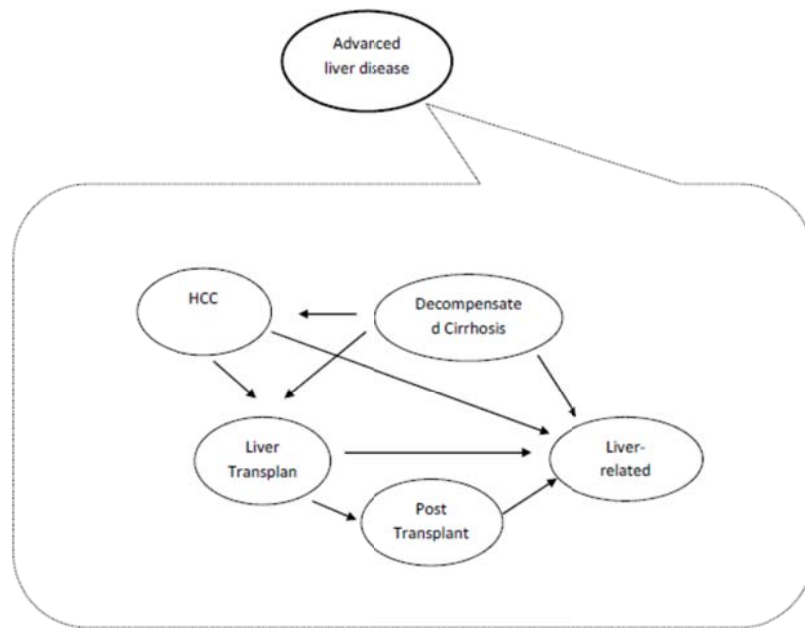

Supplement: screen-wong-1-at.pdf [file screen-wong-1-at.pdf]
